# Supplementary material for: Conceptualizing Discussions on the Dark Web: An Empirical Topic Modeling Approach
Source: Hindawi journal article supplement (doi:10.1155/2024/2775236), 2024-02-14
Supplement: f1 [file 2775236.f1.docx]

# **Appendix**

The following table describes the abbreviations and symbols included in this paper.

| **Abbreviation / Symbol** | **Description** |
| --- | --- |
| TOR | The Onion Router |
| LDA | Latent Dirichlet Allocation |
| CTM | Correlated Topic Model |
| PAM | Pachinko Allocation Topic Model |
| PTM | Pseudo-document Topic Model |
| TF-IDF | Term Frequency-Inverse Document Frequency |
| PMI | Pointwise Mutual Information |
| NPMI | Normalized Pointwise Mutual Information |
| BoW | Bag of Words model |
| MCMC | Markov Chain Monte Carlo |
| P(wd) | The probability of a word *w* in document *d* |
| P(wi,wj) | The probability of a pair of words *wi* and *wj* co-occurrences |
| ϵ | A small value added to prevent the logarithm of zero |
| γ | A weighting factor used to give high NPMI values more weight |
